# Supplementary material for: Highly efficient MoIV3⋯SbIII cluster frustrated Lewis pair hydrogenation
Source: Royal Society of Chemistry journal article supplement (doi:10.1039/c9dt04138a), 2019-01-01
Supplement: c9dt04138a1.pdf [file c9dt04138a1.pdf]

# Supporting Information

## Highly efficient Mo<sup>IV</sup><sub>3</sub>···Sb<sup>III</sup> cluster FLP hydrogenation

Fang Yu,<sup>ab</sup> and Li Xu<sup>\*a</sup>

<sup>a</sup>State Key Laboratory of Structural Chemistry, Fujian Institute of Research on the Structure of Matter, Chinese Academy of Sciences, Fuzhou, Fujian, 350002.

<sup>b</sup>University of Chinese Academy of Sciences, Beijing, 100049, China.

xli@fjirsm.ac.cn

### 1. Experimental Section

#### 1.1 Methods and Materials

All chemicals were obtained from commercial sources and used without further purification. Elemental analyses (C, H and N) were performed using a vario MICRO elemental analyzer. ICP-OES (Inductively Coupled Plasma Optical Emission Spectroscopy) analyses (Sb, Mo) were carried on Ultima 2. <sup>1</sup>H NMR spectra were recorded on a Bruker-BioSpin AVANCE III instrument at a constant temperature of 300 K. IR spectra were recorded with a Magna 750 FTIR spectrometer photometer as KBr pellets in the 4000–400 cm<sup>-1</sup> region. Thermogravimetric analyses (TGA) were performed on a Netzsch STA449C apparatus. Selectivity and conversion of catalysis reactions were measured with a Shimadzu GC 2014 plus chromatograph. The intensity data were collected on a Bruker D8-venture diffractometer with graphite-monochromated MoK $\alpha$  radiation ( $\lambda$  = 0.71073 Å). All absorption corrections were performed using multiscan. The structures were solved by direct methods and refined by full-matrix least-squares on F<sup>2</sup> with the SHELXTL-2016 program package.

#### 1.2 Synthesis

[Mo<sup>IV</sup><sub>3</sub>O<sub>2</sub>(O<sub>2</sub>CCH<sub>3</sub>)<sub>6</sub>(H<sub>2</sub>O)<sub>3</sub>]ZnCl<sub>4</sub>·8H<sub>2</sub>O was prepared according to the published procedure.<sup>13-15</sup> [Sb<sup>III</sup><sub>3</sub>Mo<sup>IV</sup><sub>3</sub>Mo<sup>VI</sup><sub>15</sub>O<sub>55</sub>(OH)<sub>2</sub>py<sub>3</sub>]·NH<sub>2</sub>(CH<sub>3</sub>)<sub>2</sub>·4NH(CH<sub>3</sub>)<sub>2</sub>·2H<sub>2</sub>O (**1**). [Mo<sub>3</sub>O<sub>2</sub>(O<sub>2</sub>CCH<sub>3</sub>)<sub>6</sub>(H<sub>2</sub>O)<sub>3</sub>]ZnCl<sub>4</sub>·8H<sub>2</sub>O (0.1 g, 0.1 mmol), Sb<sub>2</sub>O<sub>3</sub> (0.01g, 0.03 mmol) was added into a mixture of H<sub>2</sub>O (2 mL), DMF (2 mL), pyridine (8 mL) and PyCO<sub>2</sub>H (0.01 g). The resulting mixture was sealed in a 20 mL pressure bottle and heated at 120°C for two days. The reactor was cooled to room temperature at a rate of 1K/h to produce black crystals of **1** (>60% yield based on Mo). Anal. calcd. For C<sub>25</sub>H<sub>57</sub>Mo<sub>18</sub>N<sub>8</sub>O<sub>59</sub>Sb<sub>3</sub> (Mr. = 3505.95): C, 8.56; H, 1.63; N, 3.1; Sb, 10.41; Mo, 49.26%. Found: C, 9.70; H, 1.69; N, 3.29; Sb, 10.11; Mo, 50.67%. IR (KBr): 1605m (py), 1446m (py), 974m (Mo<sup>VI</sup>=O), 864s (Mo<sup>VI</sup>–O–Mo), 744s([Mo<sup>IV</sup><sub>3</sub>O<sub>4</sub>]). Pnma, a = 17.6129(6), b = 20.4536(5), c = 20.3947(7) Å, V = 7347.1(4) Å<sup>3</sup>, Z = 4, R1/wR2 = 4.41/8.88% for the observed data ( $I \geq 2\sigma(I)$ ), R1/wR2 = 7.12/9.86% for all data; CCDC-1949159.

#### 1.3 Catalytic activity tests

The hydrogenation reduction of nitroarenes to anilines with hydrazine hydrate in the presence of {Sb<sup>III</sup><sub>3</sub>Mo<sup>IV</sup><sub>3</sub>Mo<sup>VI</sup><sub>15</sub>}-**1** was investigated as a benchmark system for the optimization of the conditions. The effects of cycle number, reaction time and temperature were evaluated (see also the Supporting Information).

General procedure for the reduction of nitroarenes: Nitroarenes (10  $\mu$ L, 0.097 mmol), EtOH (2 mL) and **1** (3.5 mg, 1 mol %, 0.0029 mmol) were added into a 25 mL round bottomed flask with magnetic stirring. Then, N<sub>2</sub>H<sub>4</sub>·H<sub>2</sub>O (85%) (20  $\mu$ L, 0.3 mmol) were added into the reactor and heated to reflux with stirring at 60°C for 0.5 hours. The reaction was complete (incomplete or messy) detected by TLC (n-hexane/ethyl acetate = 5:1). The samples were obtained by centrifugation and filtration and analyzed by Shimadzu GC-2014. Recycled catalyst analyzed by IR spectrum after centrifugal separation was used in the same manner as with fresh catalyst to

determine the reusability of the catalyst as a hydrogenation agent (Figure S10). Recycle experiments were conducted under similar conditions.

The reduction of nitroarenes to anilines in this catalytic system based on  $\{\gamma\text{-Mo}^{\text{IV}}_6\text{Mo}^{\text{VI}}_7\}$ -**4** has been conducted for performance comparisons and mechanism study. Reaction conditions: catalyst (3 mol %),  $\text{PhNO}_2$  (10  $\mu\text{L}$ , 0.097 mmol),  $\text{N}_2\text{H}_4\cdot\text{H}_2\text{O}$  (20  $\mu\text{L}$ , 0.3 mmol), EtOH (2 mL), 80  $^\circ\text{C}$ , 2 h. no: only EtOH.

To determine the yield of isolated products for different functionalized anilines, the general procedure was scaled up by the factor of three. After full conversion was achieved, the resultant suspension was centrifugated and filtered through filter paper and the solvent of the filtrate was removed by rotary evaporator and dissolved in deuterated solvents ( $\text{CDCl}_3$ ) for NMR analysis. In a general protocol, the reaction time is usually limited to 0.5-2 hours, detected by TLC (n-hexane/ethyl acetate = 5:1  $\rightarrow$  2:1) to ensure complete reaction conversion.

## 2. Tables

Table S1 Bond valance sum (BVS) calculation of  $\text{H}[\text{Sb}^{\text{III}}_3\text{Mo}^{\text{IV}}_3\text{Mo}^{\text{VI}}_{15}\text{O}_{55}(\text{OH})_2\text{py}_3]$ .<sup>a</sup>

|            |           |           |           |           |           |
|------------|-----------|-----------|-----------|-----------|-----------|
| Sb1 2.962  | Sb2 3.080 | Sb3 3.126 | Mo1 4.519 | Mo2 4.501 | Mo3 6.004 |
| Mo4 5.901  | Mo5 5.914 | Mo6 5.696 | Mo7 5.617 | Mo8 5.856 | Mo9 5.913 |
| Mo10 5.950 | O1 1.931  | O2 2.069  | O3 2.050  | O4 2.155  | O5 1.879  |
| O6 1.920   | O7 1.738  | O8 2.015  | O9 1.970  | O10 1.912 | O11 2.042 |
| O12 1.759  | O13 1.988 | O14 1.819 | O15 2.007 | O16 1.940 | O17 1.880 |
| O18 2.089  | O19 1.961 | O20 1.842 | O21 1.983 | O22 2.109 | O23 2.240 |
| O24 1.887  | O25 1.169 | O26 2.102 | O27 1.827 | O28 1.754 | O29 1.754 |
| O30 1.696  | O31 1.898 | O32 1.837 | O33 1.857 |           |           |

<sup>a</sup>Oxygen atoms with the BVS values below 1.2 are assigned as  $\text{OH}^-$  (capping O25, marked in red).

## 3. Figures

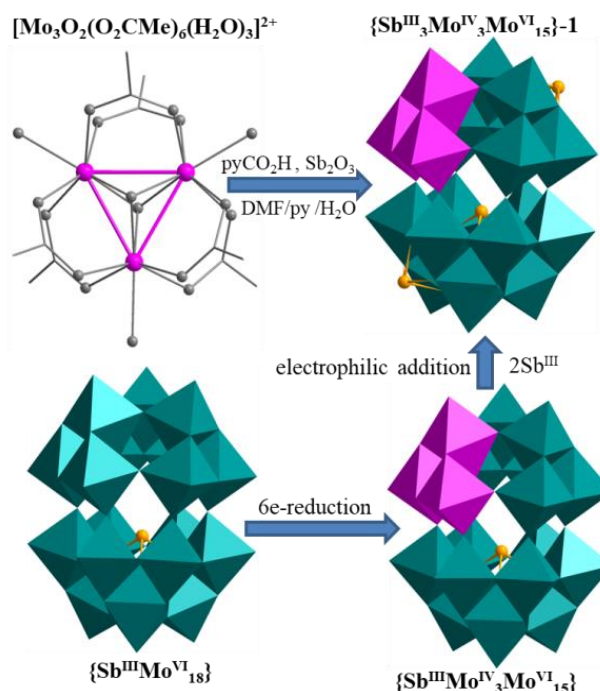

**Figure S1.** Solvothermal synthesis of  $\{\text{Sb}^{\text{III}}_3\text{Mo}^{\text{IV}}_3\text{Mo}^{\text{VI}}_{15}\}$ -1 through organic acid-assisted oxidative aggregation of  $[\text{Mo}^{\text{IV}}_3\text{O}_2(\text{O}_2\text{CMe})_6(\text{H}_2\text{O})_3]^{2+}$  and  $\text{Sb}_2\text{O}_3$ . It is related to the non-tetrahedral Dawson variant  $\{\text{Sb}^{\text{III}}\text{Mo}^{\text{VI}}_{18}\}$  subject to 6e-reduction at one (marked in purple) of the six  $[\text{Mo}^{\text{VI}}_3\text{O}_4]$  incomplete cuboidal units followed by electrophilic addition of two  $\text{Sb}^{\text{III}}$  ( $\text{Sb}^{\text{III}}$ , light orange;  $\text{Mo}^{\text{IV}}$  octahedron, purple;  $\text{Mo}^{\text{VI}}$  octahedron, teal).

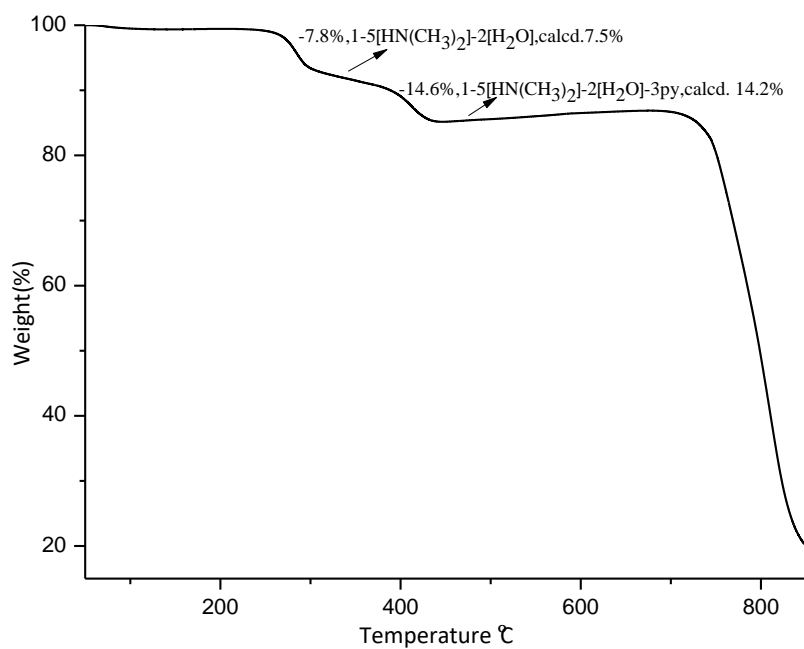

**Figure S2.** Thermogravimetric analysis of **1** under nitrogen.

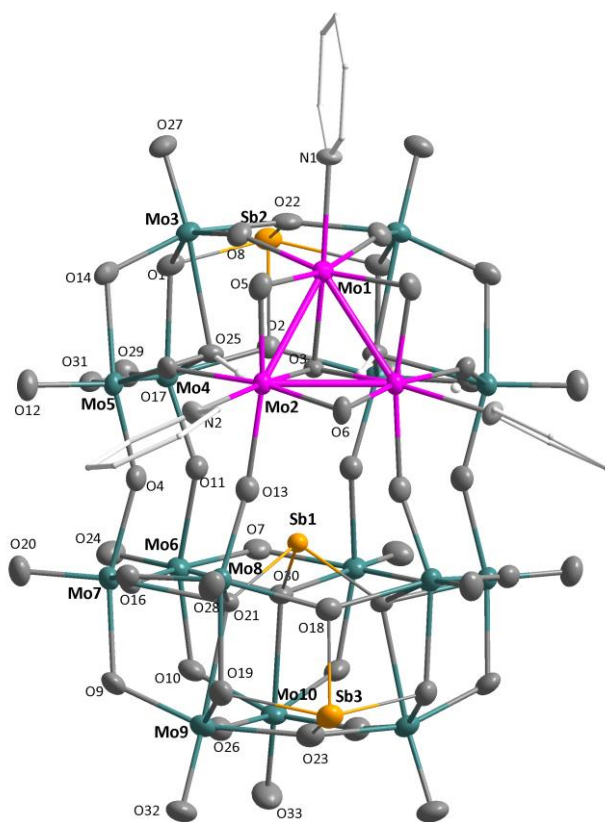

**Figure S3.** Structure of [Sb<sup>III</sup><sub>3</sub>Mo<sup>IV</sup><sub>3</sub>Mo<sup>VI</sup><sub>15</sub>O<sub>55</sub>(OH)<sub>2</sub>py<sub>3</sub>]<sup>-</sup> (Sb<sup>III</sup>, light orange; Mo<sup>IV</sup>, purple; Mo<sup>VI</sup>, teal.) with 50% probability thermal ellipsoids for non-carbon atoms.

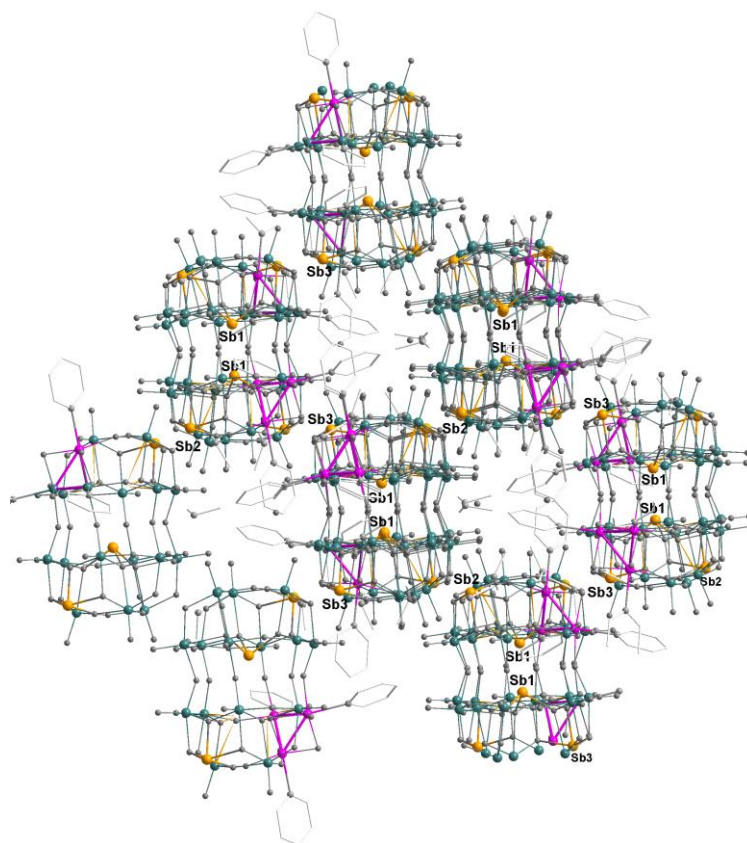

**Figure S4.** Crystal packing of  $[\text{Sb}^{\text{III}}_3\text{Mo}^{\text{IV}}_3\text{Mo}^{\text{VI}}_{15}\text{O}_{55}(\text{OH})_2\text{py}_3]\cdot\text{NH}_2(\text{CH}_3)_2\cdot 4\text{NH}(\text{CH}_3)_2\cdot 2\text{H}_2\text{O}$  showing the capping arrangement between Sb3 (light orange) and  $\text{Mo}^{\text{VI}}_3$  triangles (purple).

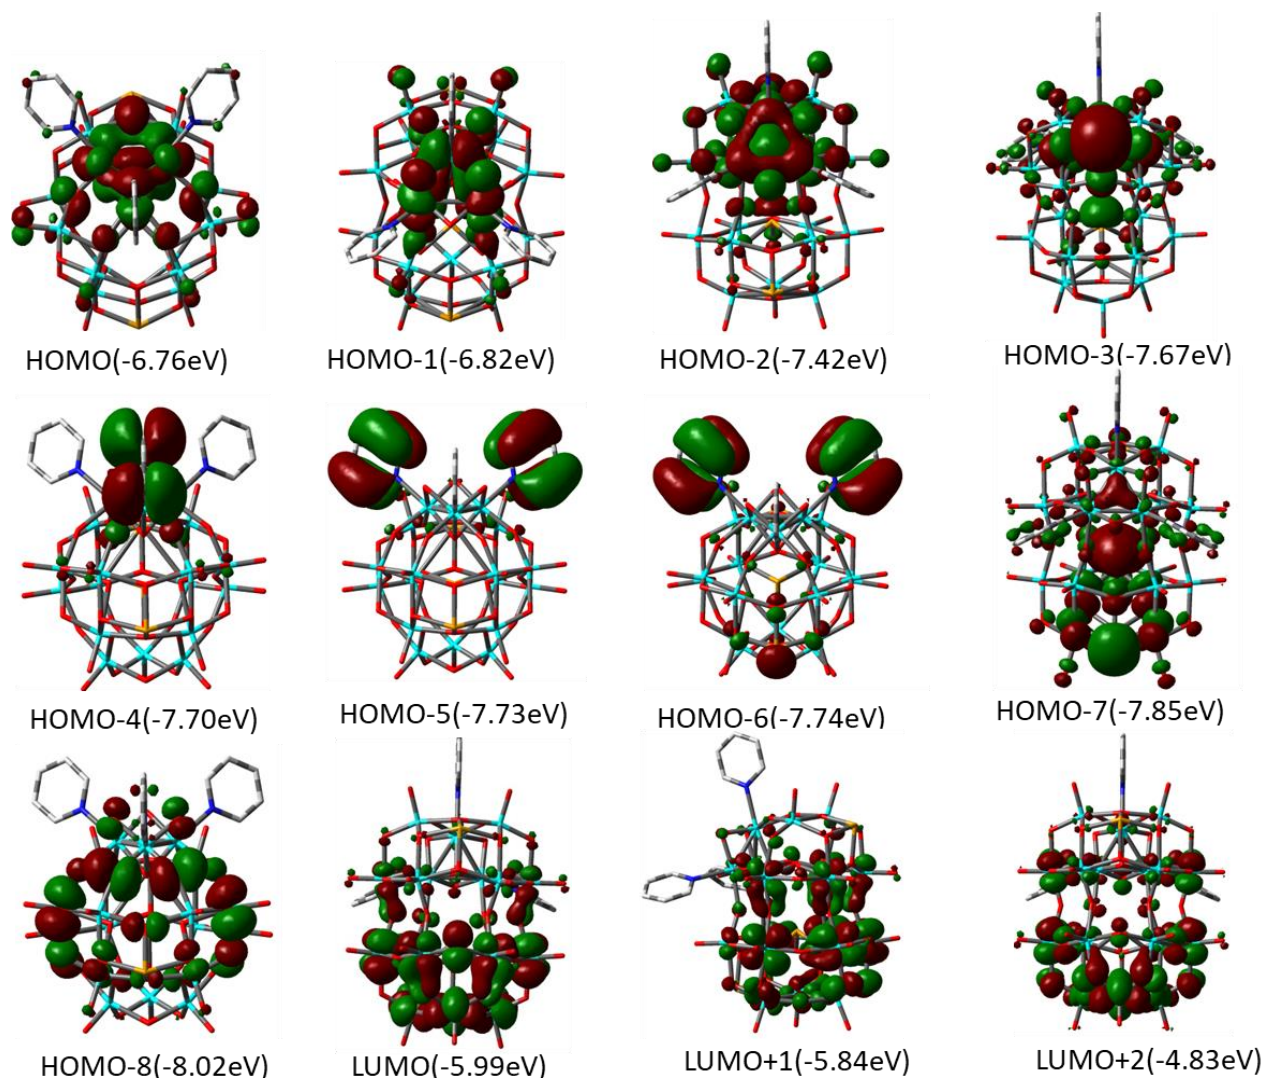

**Figure S5.** Diagrams of frontier molecular orbitals of **1**.



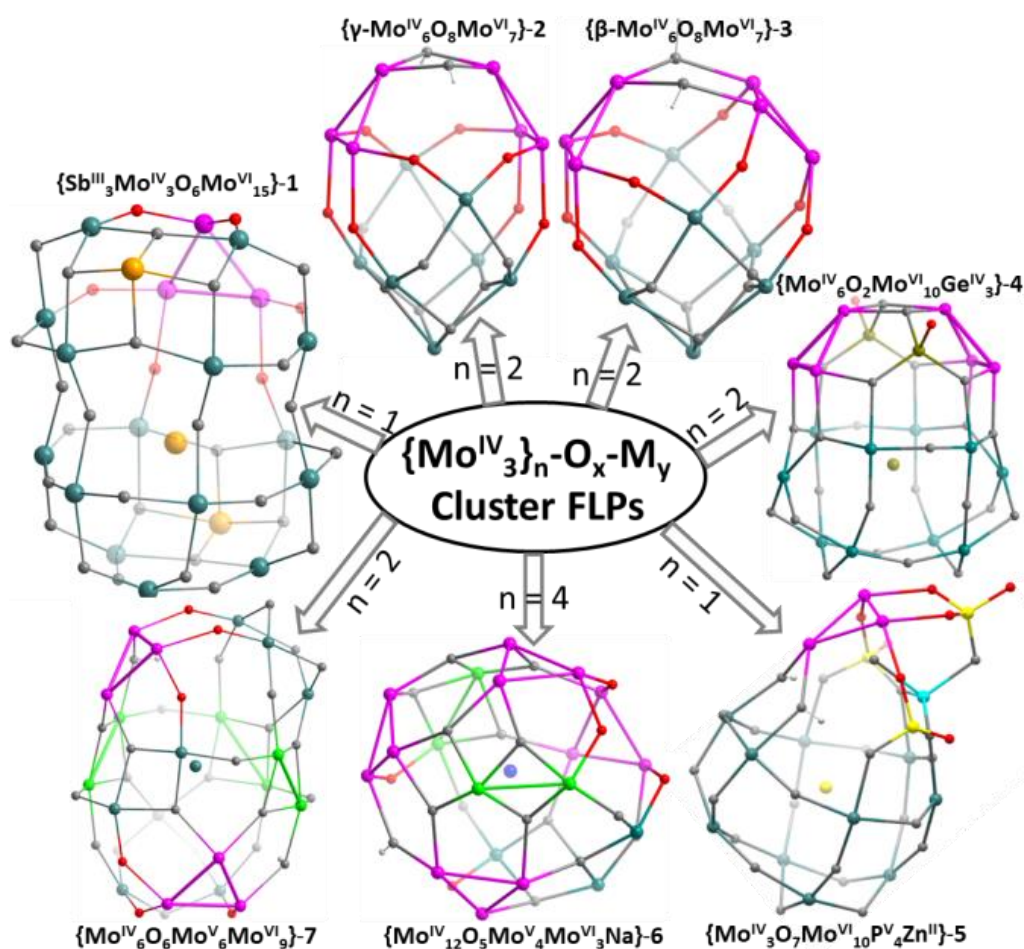

**Figure 6.** POM-FLPs nanocages of the CFLP hybrid clusters 1-7 built of multiple  $\text{Mo}^{\text{IV}}\text{-}\mu_2\text{-O-M}$  Lewis pairs wherein the most negative  $\mu_2\text{-O}$  bonded to  $\text{Mo}^{\text{IV}}$  are marked in red ( $\text{Mo}^{\text{IV}}$ , purple;  $\text{Mo}^{\text{V}}$ , green;  $\text{Mo}^{\text{VI}}$ , teal;  $\text{Sb}^{\text{III}}$ , light orange;  $\text{P}^{\text{V}}$ , yellow;  $\text{Ge}^{4+}$ , dark yellow;  $\text{Zn}^{\text{II}}$ , turquoise;  $\text{Na}^+$ , blue).

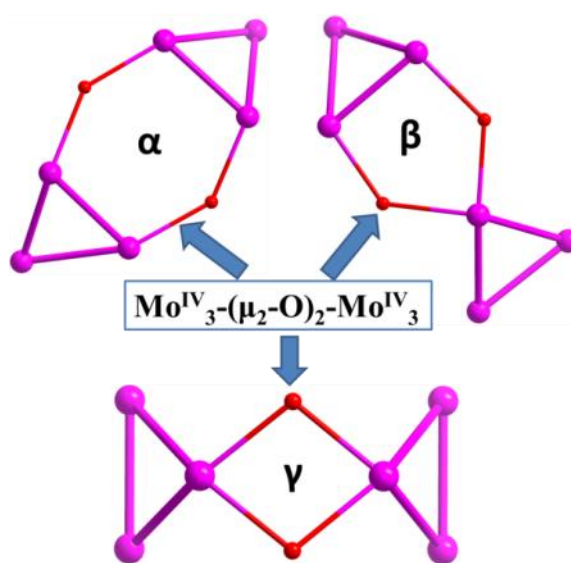

**Figure S7.** Three types of linkage between two neighbouring triangular  $\text{Mo}^{\text{IV}}_3$  units bridged by oxygen atoms.

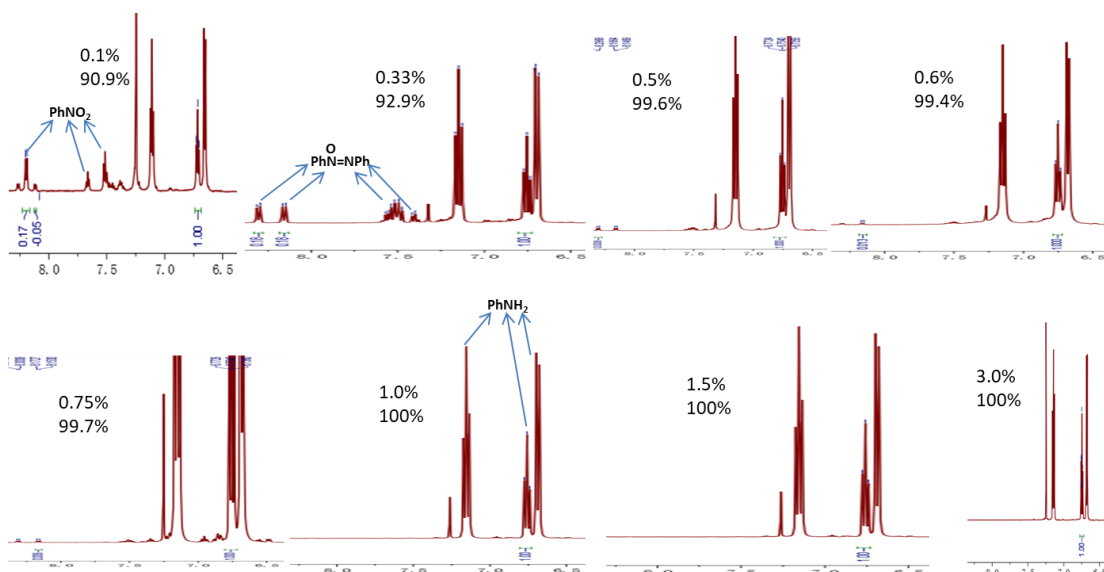

**Figure S8.**  $^1\text{H}$  NMR spectra for hydrazine hydrogenation of nitrobenzene to aniline catalyzed by different amount of **1**. reaction conditions: ( $\text{PhNO}_2$ , 10  $\mu\text{L}$ , 0.097 mmol,  $\text{N}_2\text{H}_4\cdot\text{H}_2\text{O}$ , 20  $\mu\text{L}$ , 0.3 mmol, EtOH, 2 mL, 2 h,  $60^\circ\text{C}$ ).

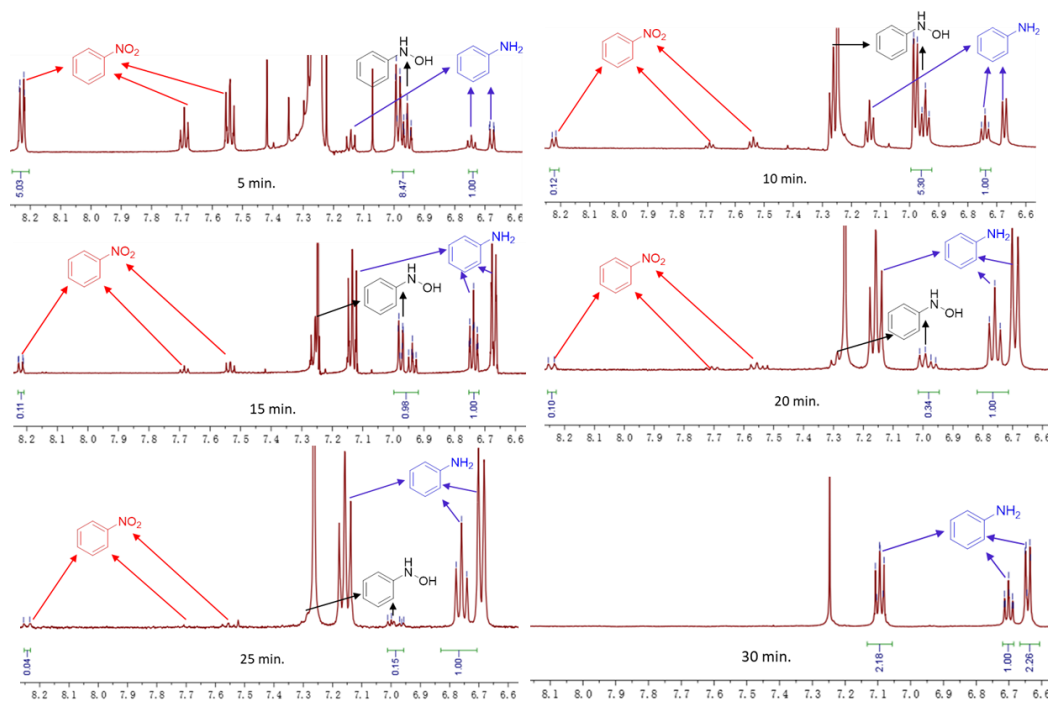

**Figure S9.**  $^1\text{H}$  NMR spectra for hydrazine reduction of nitrobenzene to aniline catalysed by **1** at different reaction time. reaction conditions: **1**, 3 mol%,  $\text{PhNO}_2$ , 10  $\mu\text{L}$ , 0.097 mmol,  $\text{N}_2\text{H}_4\cdot\text{H}_2\text{O}$ , 20  $\mu\text{L}$ , 0.3 mmol, EtOH, 2 mL,  $80^\circ\text{C}$ .

#### 4. Characterization data of the isolated products.

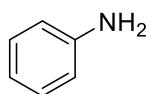

**Aniline:** isolated yield: 100%.  $^1\text{H}$  NMR (600 MHz,  $\text{CDCl}_3$ ),  $\delta$  7.35 – 7.13 (m, 2H), 6.90 – 6.77 (m, 1H), 6.74 – 6.63 (m, 1H), 3.66 (s, 2H).  $^{13}\text{C}$  NMR (151 MHz,  $\text{CDCl}_3$ ),  $\delta$  146.59, 129.45, 118.67, 115.28.

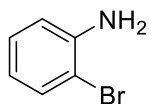

**2-bromoaniline:** isolated yield: 99.9%.  $^1\text{H}$  NMR (600 MHz,  $\text{CDCl}_3$ ),  $\delta$  7.40 – 7.41 (m, 1.4 Hz, 1H), 7.11 – 7.09 (m, 1H), 6.76 – 6.75 (m, 1H), 6.63 – 6.60 (m, 1H), 4.07 (s, 2H).  $^{13}\text{C}$  NMR (151 MHz,  $\text{CDCl}_3$ ),  $\delta$  144.17, 132.68, 128.45, 119.52, 115.87, 109.43.

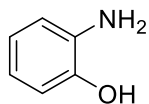

**2-aminophenol:** isolated yield: 99.8%.  $^1\text{H}$  NMR (600 MHz,  $\text{DMSO} - \text{D}_6$ ),  $\delta$  8.89 (s, 1H), 6.59 – 6.68 (m, 1.2 Hz, 1H), 6.54 – 6.52 (m, 1.6 Hz, 1H), 6.50 – 6.47 (m, 1.3 Hz, 1H), 6.36 – 6.34 (m, 1.6 Hz, 1H), 4.42 (s, 1H).  $^{13}\text{C}$  NMR (151 MHz,  $\text{DMSO} - \text{D}_6$ ),  $\delta$  144.48, 137.05, 120.01, 116.92, 114.93, 114.86.

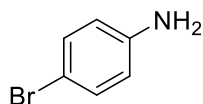

**4-bromoaniline:** isolated yield: 99.9%.  $^1\text{H}$  NMR (600 MHz,  $\text{CDCl}_3$ ),  $\delta$  7.22 (d,  $J$  = 8.8 Hz, 2H), 6.55 (d,  $J$  = 8.8 Hz, 2H), 3.65 (s, 2H).  $^{13}\text{C}$  NMR (151 MHz,  $\text{CDCl}_3$ ),  $\delta$  145.50, 132.09, 116.80, 110.28.

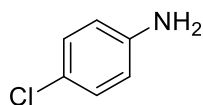

**4-chloroaniline:** isolated yield: 99.9%.  $^1\text{H}$  NMR (600 MHz,  $\text{CDCl}_3$ ),  $\delta$  7.20 – 6.98 (m, 2H), 6.76 – 6.39 (m, 2H), 3.64 (s, 2H).  $^{13}\text{C}$  NMR (151 MHz,  $\text{CDCl}_3$ ),  $\delta$  145.04, 129.20, 123.22, 116.32.

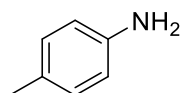

**p-toluidine:** isolated yield: 99.8%.  $^1\text{H}$  NMR (600 MHz,  $\text{CDCl}_3$ ),  $\delta$  6.97 – 6.95 (m, 2H), 6.61 – 6.60 (m, 2H), 3.52 (s, 2H), 2.24 (s, 3H).  $^{13}\text{C}$  NMR (151 MHz,  $\text{CDCl}_3$ ),  $\delta$  143.88, 129.84, 127.90, 115.36, 20.55.

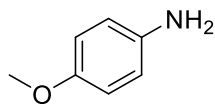

**4-methoxyaniline:** isolated yield: 81.2%.  $^1\text{H}$  NMR (600 MHz,  $\text{CDCl}_3$ ),  $\delta$  6.74 – 6.72 (m, 2H), 6.65 – 6.53 (m, 2H), 3.73 (s, 3H), 3.41 (s, 2H).  $^{13}\text{C}$  NMR (151 MHz,  $\text{CDCl}_3$ ),  $\delta$  152.88, 140.02, 116.52, 114.89, 55.83.

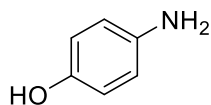

**4-aminophenol:** isolated yield: 61.2%.  $^1\text{H}$  NMR (600 MHz,  $\text{DMSO} - \text{D}_6$ ),  $\delta$  8.32 (s, 1H), 6.54 – 6.40 (m, 2H), 6.40 – 6.18 (m, 2H), 4.33 (s, 2H).  $^{13}\text{C}$  NMR (151 MHz,  $\text{DMSO} - \text{D}_6$ ),  $\delta$  148.73, 141.17, 116.06, 115.77.



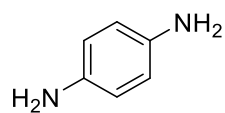

**benzene-1,4-diamine:** isolated yield: 39.2%.  $^1\text{H}$  NMR (600 MHz,  $\text{CDCl}_3$ ),  $\delta$  6.56 (s, 4H), 3.32 (s, 4H).  
 $^{13}\text{C}$  NMR (151 MHz,  $\text{CDCl}_3$ ),  $\delta$  138.67, 116.82.

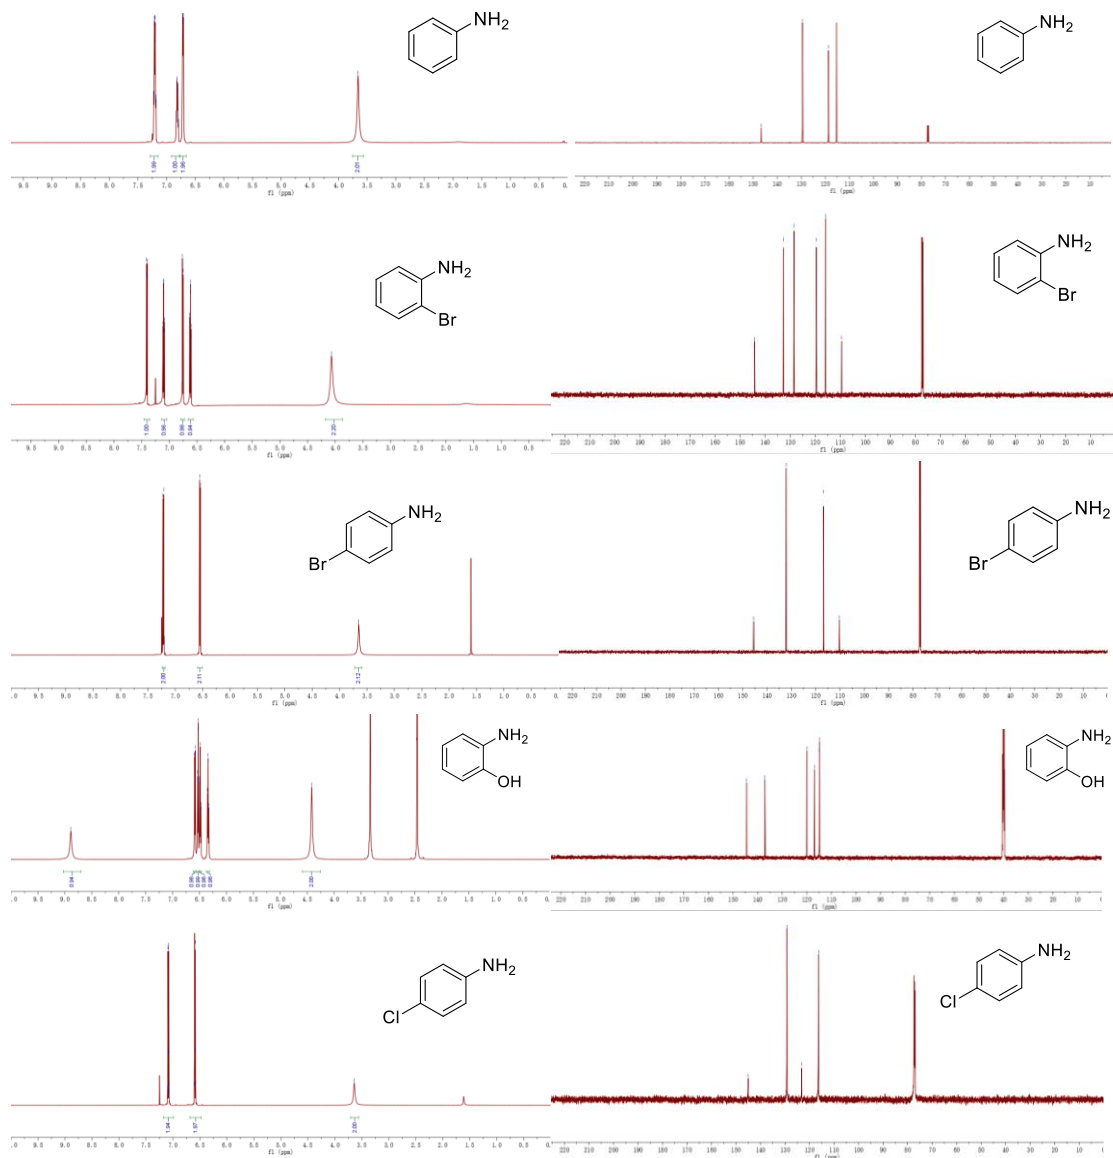

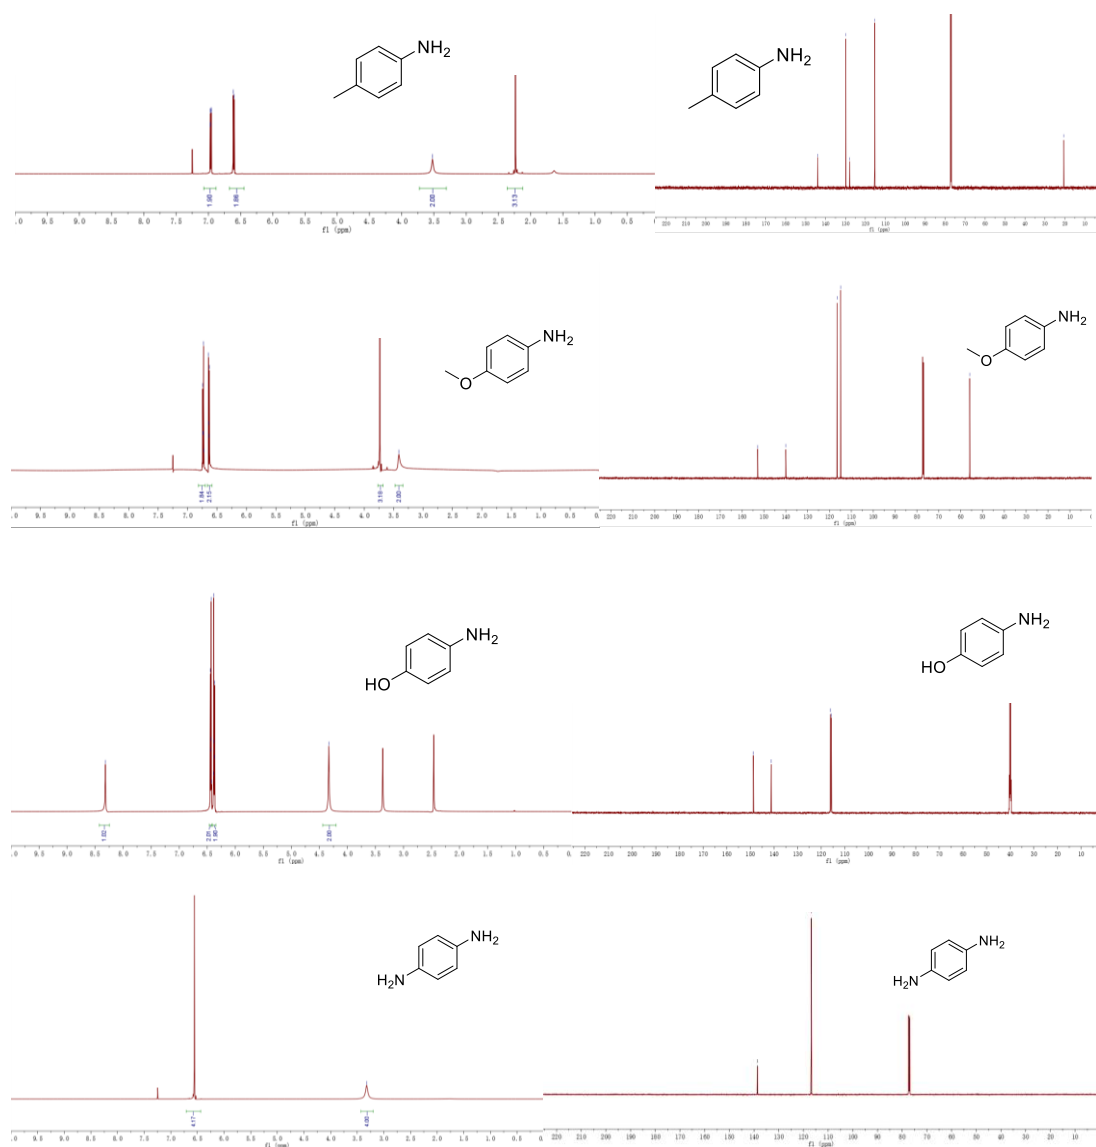

**Figure S10.**  $^1\text{H}$  NMR and  $^{13}\text{C}$  NMR spectra of the isolated products.

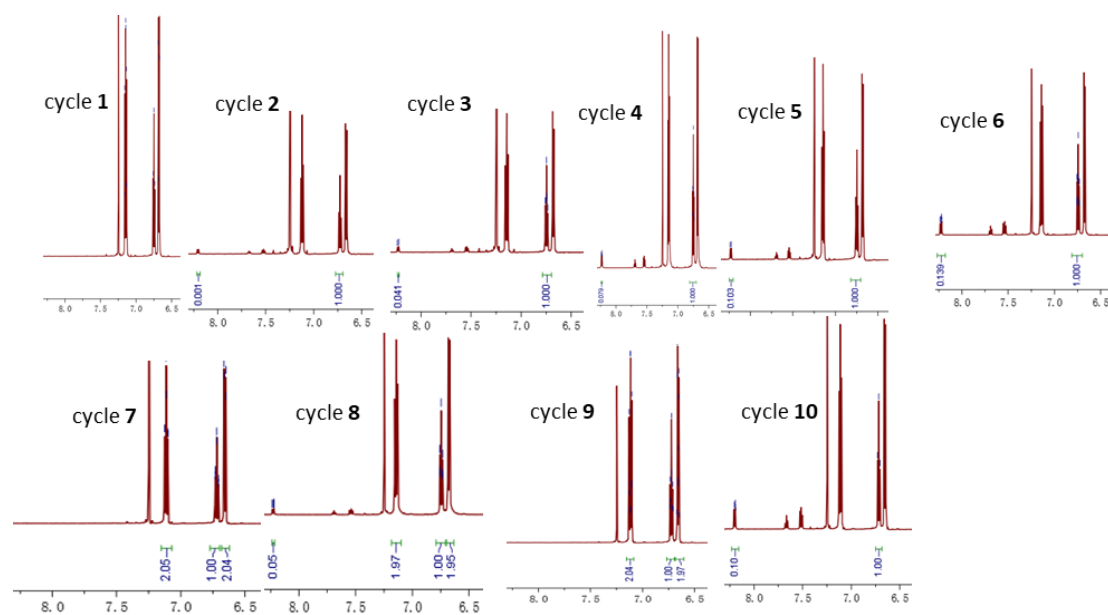

**Figure S11.**  $^1\text{H}$  NMR spectra of cycle 1-10 hydrazine reduction of nitrobenzene to aniline. catalysis conditions: 1, 3 mol%,  $\text{PhNO}_2$ , 10  $\mu\text{L}$ , 0.097 mmol,  $\text{N}_2\text{H}_4\cdot\text{H}_2\text{O}$ , 20  $\mu\text{L}$ , 0.3 mmol, EtOH, 2 mL, 80°C, fresh and cycle 1, 0.5 h, cycle 2, 1h, cycles 3-10, 2h.

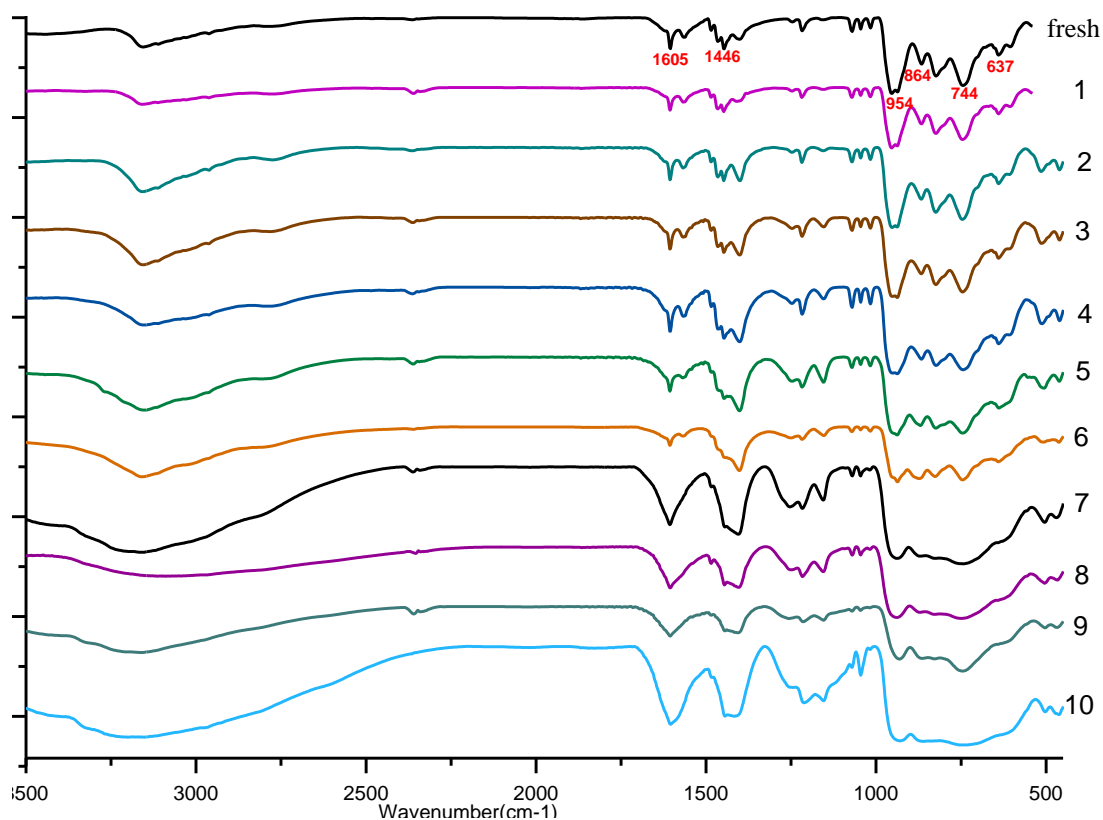

**Figure S12.** IR spectra of the heterogeneous catalyst **1** in fresh and cycles 1-10.

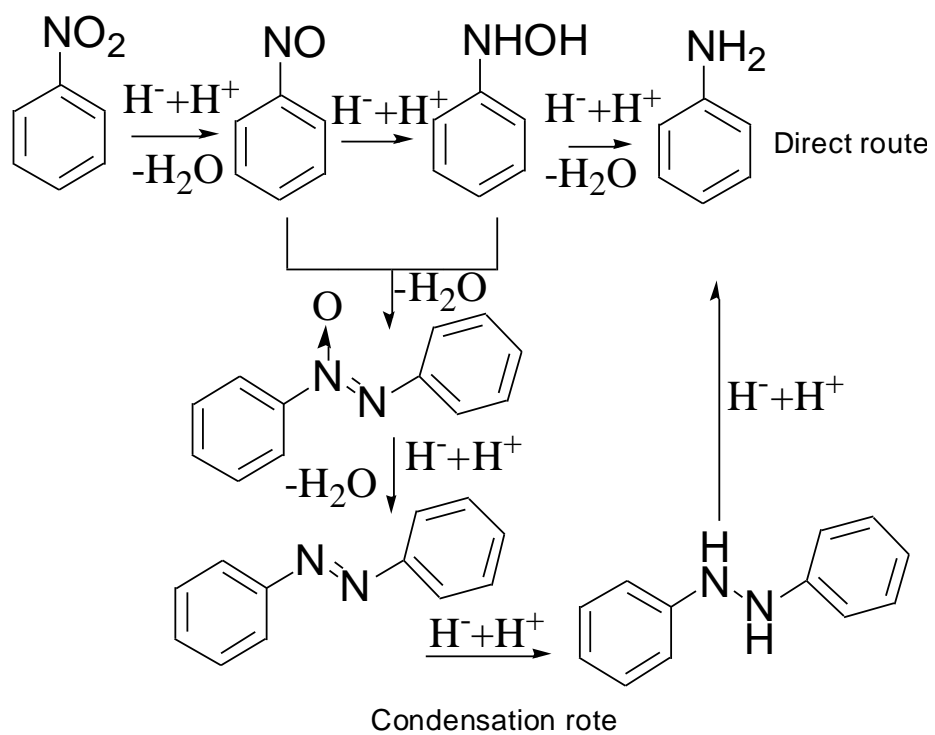

**Scheme S1.** Direct and condensation route of the nitrobenzene reduction to aniline.
